# Supplementary material for: Novel Healthy Eating Index to Examine Daily Food Guides Adherence and Frailty in Older Taiwanese
Source: MDPI journal article supplement (doi:10.3390/nu13124210), 2021-11-24
Supplement: s1 [file s1]

## Supplementary tables

**Supplemented Table S1: Food servings recommendation based on calorie levels and density basis <sup>1</sup>**

| Food group                                      | Servings based on calorie level (kcal) |            |            |            |            |            |           | Servings per 1,000 kcal |            |            |            |            |            |            |
|-------------------------------------------------|----------------------------------------|------------|------------|------------|------------|------------|-----------|-------------------------|------------|------------|------------|------------|------------|------------|
|                                                 | 1200                                   | 1500       | 1800       | 2000       | 2200       | 2500       | 2700      | 1200                    | 1500       | 1800       | 2000       | 2200       | 2500       | 2700       |
| Grains (serving) <sup>2</sup>                   | <b>6</b>                               | <b>10</b>  | <b>12</b>  | <b>12</b>  | <b>14</b>  | <b>16</b>  | <b>16</b> | <b>5</b>                | <b>6.7</b> | <b>6.7</b> | <b>6</b>   | <b>6.4</b> | <b>6.4</b> | <b>5.9</b> |
| Whole grains                                    | 4                                      | 4          | 4          | 4          | 6          | 6          | 6         | 3.3                     | 2.7        | 2.2        | 2          | 2.7        | 2.4        | 2.2        |
| Other / refined grains                          | 2                                      | 6          | 8          | 8          | 8          | 10         | 10        | 1.7                     | 4          | 4.4        | 4          | 3.6        | 4          | 3.7        |
| Beans, fish, egg, & meat (serving) <sup>3</sup> | <b>3</b>                               | <b>4</b>   | <b>5</b>   | <b>6</b>   | <b>6</b>   | <b>7</b>   | <b>8</b>  | <b>2.5</b>              | <b>2.7</b> | <b>2.8</b> | <b>3</b>   | <b>2.7</b> | <b>2.8</b> | <b>3</b>   |
| Plant & seafood proteins                        | 1                                      | 1.5        | 1.5        | 2          | 2          | 2          | 2.5       | 0.8                     | 1          | 0.8        | 1          | 0.9        | 0.8        | 0.9        |
| Eggs, meat, & poultry                           | 2                                      | 2.5        | 3.5        | 4          | 4          | 5          | 5.5       | 1.7                     | 1.7        | 1.9        | 2          | 1.8        | 2          | 2          |
| Dairy (serving) <sup>4</sup>                    | <b>1.5</b>                             | <b>1.5</b> | <b>1.5</b> | <b>1.5</b> | <b>1.5</b> | <b>1.5</b> | <b>2</b>  | <b>1.3</b>              | <b>1</b>   | <b>0.8</b> | <b>0.8</b> | <b>0.7</b> | <b>0.6</b> | <b>0.7</b> |
| Vegetables (serving) <sup>5</sup>               | <b>3</b>                               | <b>3</b>   | <b>3</b>   | <b>4</b>   | <b>4</b>   | <b>5</b>   | <b>5</b>  | <b>2.5</b>              | <b>2</b>   | <b>1.7</b> | <b>2</b>   | <b>1.8</b> | <b>2</b>   | <b>1.9</b> |
| Dark colored vegetables                         | 1                                      | 1          | 1          | 1.5        | 1.5        | 1.5        | 1.5       | 0.8                     | 0.7        | 0.6        | 0.8        | 0.7        | 0.6        | 0.6        |
| Other vegetables                                | 2                                      | 2          | 2          | 2.5        | 2.5        | 3.5        | 3.5       | 1.7                     | 1.3        | 1.1        | 1.3        | 1.1        | 1.4        | 1.3        |
| Fruits (serving) <sup>6</sup>                   | <b>2</b>                               | <b>2</b>   | <b>2</b>   | <b>3</b>   | <b>3.5</b> | <b>4</b>   | <b>4</b>  | <b>1.7</b>              | <b>1.3</b> | <b>1.1</b> | <b>1.5</b> | <b>1.6</b> | <b>1.6</b> | <b>1.5</b> |
| Oils, nuts & seeds (servings) <sup>7</sup>      | <b>4</b>                               | <b>4</b>   | <b>5</b>   | <b>6</b>   | <b>6</b>   | <b>7</b>   | <b>8</b>  | <b>3.3</b>              | <b>2.7</b> | <b>2.8</b> | <b>3</b>   | <b>2.7</b> | <b>2.8</b> | <b>3</b>   |
| Oils (servings)                                 | 3                                      | 3          | 4          | 5          | 5          | 6          | 7         | 2.5                     | 2          | 2.2        | 2.5        | 2.3        | 2.4        | 2.6        |
| Nuts and seeds (serving)                        | 1                                      | 1          | 1          | 1          | 1          | 1          | 1         | 0.8                     | 0.7        | 0.6        | 0.5        | 0.5        | 0.4        | 0.4        |

Abbreviation: kcal, kilocalories.

<sup>1</sup> Based on Daily Food Guides Taiwan

<sup>2</sup> Provides 70 kcal with 2 grams of protein, and 15 grams of carbohydrate in each serving.

<sup>3</sup> Provides 55 kcal with 7grams of protein and 3 grams of fat in each serving of lean meat; 75 kcal with 7 grams of protein and 5 grams of fat in each serving of medium fat meat; 120 kcal with 7 grams of protein and 10 grams of fat in each serving of high fat meat.

<sup>4</sup> Provides 150 kcal with 8 grams of protein, 8 grams of fat, 12 grams of carbohydrate in each serving.

<sup>5</sup> Provides 25 kcal with 1 gram of protein and 5 grams of carbohydrate in each serving.

<sup>6</sup> Provides 60 kcal with 15 grams of carbohydrates in each serving.

<sup>7</sup> Provides 45 kcal with 5 grams of fat in each serving.

**Supplemented Table S2: Scoring standards for DASH score and median intake for Q1 (low consumption) and Q5 (high consumption) among participants <sup>1</sup>**

| Component                       | Scoring criteria | Q1, servings/day       | Q5, servings/day         |
|---------------------------------|------------------|------------------------|--------------------------|
| <b>Adequacy</b>                 |                  |                        |                          |
| Fruits                          |                  | 0 (0 – 0.1)            | 2.3 (2.0 – 3.1)          |
| Vegetables                      | Q1 = 1 point     | 2 (1.9 – 2.0)          | 5.9 (4.1 – 6.1)          |
|                                 | Q2 = 2 points    |                        |                          |
| Nuts & legumes                  | Q3 = 3 points    | 0.5 (0.2 – 0.7)        | 5.7 (4.8 – 6.3)          |
| Whole grains                    | Q4 = 4 points    | 0.3 (0.2 – 0.5)        | 2.5 (2.2 – 4.2)          |
|                                 | Q5 = 5 points    |                        |                          |
| Dairy                           |                  | 0 (0 – 0)              | 1.1 (1.1 – 1.6)          |
| <b>Reverse scoring</b>          |                  |                        |                          |
| Sodium (mg)                     | Q1 = 5 points    | 936.5 (604.8 – 1209.5) | 3106.4 (2902.9 – 4160.5) |
|                                 | Q2 = 4 points    |                        |                          |
| Red & processed meat            | Q3 = 3 points    | 0.3 (0.3 – 0.5)        | 2.2 (2.0 – 3.0)          |
|                                 | Q4 = 2 points    | 0 (0 – 0)              | 0.8 (0.3 – 1.1)          |
| Sweetened beverage <sup>2</sup> | Q5 = 1 point     |                        |                          |

Abbreviations: DASH, Dietary Approach to Stop Hypertension; IQR, interquartile range; Q, quintile.

<sup>1</sup> Values are servings/day, expressed as median (IQR); except for sodium, expressed as mg.

<sup>2</sup> Grouped into tertiles due to only few cases consumed sweetened beverage.

**Supplemented Table S3: Median daily consumption for components in MDS based on sex <sup>1</sup>**

| Component                    | Sex-specific median |                |
|------------------------------|---------------------|----------------|
|                              | Men (n= 50)         | Women (n= 104) |
| <b>Beneficial components</b> |                     |                |
| Vegetables                   | 3.86                | 3.90           |
| Legumes                      | 0.93                | 1.30           |
| Fruits & nuts                | 1.27                | 0.68           |
| Whole grains / cereal        | 1.17                | 0.97           |
| Fish                         | 1.21                | 1.07           |
| Ethanol                      | ≥ 10 g & < 50 g     | ≥ 5 g & < 25 g |
| MUFA : SFA                   | 0.72                | 1.24           |
| <b>Detrimental component</b> |                     |                |
| Diary                        | 0.74                | 0.13           |
| Meat & meat product          | 2.60                | 2.26           |

Abbreviations: MDS, Mediterranean diet score; MUFA, monounsaturated fatty acid; SFA, saturated fatty acid.

<sup>1</sup> Values are servings/day, expressed as median.

**Supplemented Table S4: Median (IQR) intake of six food groups per 1,000 kcal density for overall participants and across frailty status <sup>1</sup>**

|                          | Overall (n= 154)           | Non-frail (n= 19)          | Prefrail (n= 119)          | Frail (n= 16)            | <i>P</i> trend <sup>2</sup> |
|--------------------------|----------------------------|----------------------------|----------------------------|--------------------------|-----------------------------|
| Calorie intake (kcal)    | 1690.9 ( 1481.5 - 2010.1 ) | 1711.2 ( 1469.6 - 1950.3 ) | 1657.7 ( 1485.5 - 2010.1 ) | 1890.7 ( 1533 - 2010.1 ) | 0.507                       |
| Total grains             | 5.2 ( 3.9 - 5.8 )          | 4.9 ( 3.9 - 6.5 )          | 5.2 ( 3.9 - 5.8 )          | 4.7 ( 3.9 - 5.5 )        | 0.366                       |
| Whole grains             | 0.7 ( 0.4 - 1.4 )          | 1.4 ( 0.5 - 2.3 )          | 0.7 ( 0.4 - 1.4 )          | 0.4 ( 0.1 - 0.7 )        | <b>0.006</b>                |
| Total vegetables         | 2.0 ( 1.9 - 2.6 )          | 2.3 ( 1.9 - 2.7 )          | 1.9 ( 1.9 - 2.6 )          | 1.9 ( 1.7 - 2.5 )        | 0.105                       |
| Dark-colored vegetables  | 0.8 ( 0.6 - 1.1 )          | 1.0 ( 0.6 - 1.4 )          | 0.8 ( 0.6 - 1.1 )          | 0.6 ( 0.6 - 0.8 )        | <b>0.010</b>                |
| Fruits                   | 0.5 ( 0.3 - 0.9 )          | 0.6 ( 0.3 - 1.1 )          | 0.5 ( 0.3 - 0.9 )          | 0.3 ( 0 - 0.8 )          | 0.084                       |
| Dairy                    | 0.1 ( 0 - 0.5 )            | 0.2 ( 0.1 - 0.6 )          | 0.2 ( 0 - 0.6 )            | 0.0 ( 0 - 0.4 )          | 0.076                       |
| Total protein foods      | 3.1 ( 2.4 - 3.5 )          | 3.1 ( 2 - 3.7 )            | 3.1 ( 2.4 - 3.5 )          | 3.1 ( 2.5 - 3.5 )        | 0.623                       |
| Plant proteins & seafood | 1.4 ( 1.0 - 2.0 )          | 1.1 ( 1.0 - 2.0 )          | 1.4 ( 1.0 - 2.0 )          | 1.5 ( 1.0 - 1.8 )        | 0.723                       |
| Oils, nuts & seeds       | 3.3 ( 0.4 - 4.1 )          | 3.7 ( 0.7 - 4.1 )          | 3.3 ( 0.4 - 4.2 )          | 1.7 ( 0.4 - 4.2 )        | 0.358                       |
| Nut & seeds              | 0.0 ( 0 - 0.3 )            | 0.1 ( 0 - 0.5 )            | 0.0 ( 0 - 0.3 )            | 0.0 ( 0 - 0.1 )          | <b>0.028</b>                |
| Energy from fats (%)     | 32.0 ( 29.6 - 36.2 )       | 30.7 ( 27.8 - 37.2 )       | 32.2 ( 29.6 - 35.7 )       | 29.6 ( 29.6 - 39.3 )     | 0.960                       |

Abbreviations: IQR, interquartile range.

<sup>1</sup> Values are servings/day unless otherwise indicated. All values are expressed as median (interquartile range).

<sup>2</sup> Based on Jonckheere-Terpstra test.

Supplementary figure

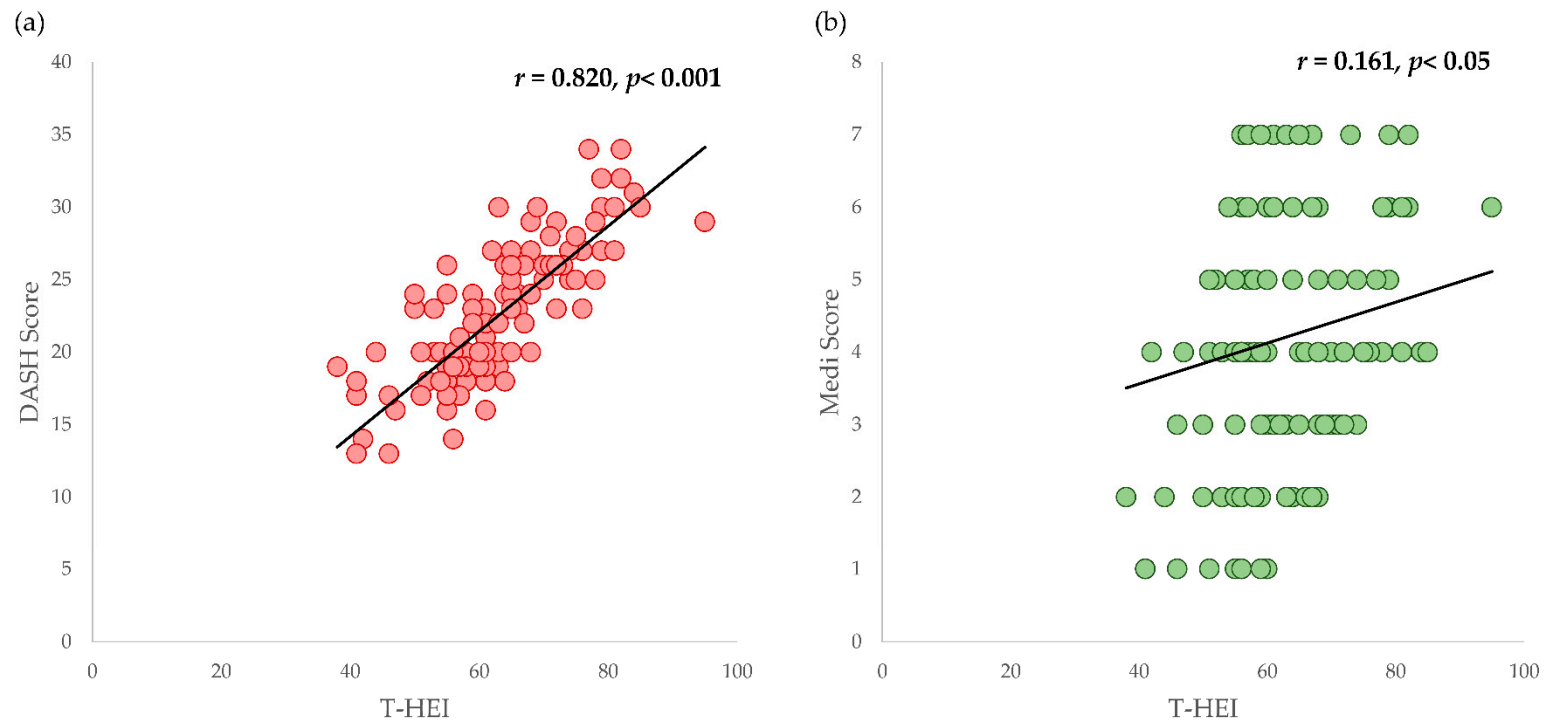

**Supplemented Figure S1:** Scatter plot for correlation analysis of (a) T-HEI and DASH score, and (b) T-HEI and
